# Supplementary material for: Urine proteomics identifies biomarkers for diabetic kidney disease at different stages
Source: Clin Proteomics. 2021 Dec 29;18:32. doi: 10.1186/s12014-021-09338-6 (PMC8903606; doi:10.1186/s12014-021-09338-6)
Supplement: Supplementary file 8 — Additional file 8: Table S6. Differentially excreted proteins of diabetes and pre-DKD3. [file 12014_2021_9338_MOESM8_ESM.xlsx]

## Sheet: DEPs_D vs pre-DKD3
Symbol	Detected_frequency_Diabetes	Detected_frequency_pre-DKD 3	Wilcoxon_P	Mean_Diabetes	Mean_pre-DKD3	Max_index	Ratio
XPNPEP2	1	1	0.0228747	49.781	23.081	Diabetes	0.465
VASN	1	1	0.0372534	412.176	204.386	Diabetes	0.496
SERPINA5	1	1	0.0423094	592.386	280.588	Diabetes	0.474
MAN1A1	0.99	0.923	0.0104683	70.075	31.893	Diabetes	0.456
BROX	0.971	0.846	0.00206429	35.672	13.326	Diabetes	0.375
ARSF	0.951	0.923	0.0427418	15.155	6.48	Diabetes	0.431
CAPN7	0.942	0.769	0.00194225	17.561	4.797	Diabetes	0.277
VPS4A	0.932	0.692	0.00777392	17.76	7.194	Diabetes	0.408
SLC2A5	0.913	0.769	0.0235964	20.705	9.18	Diabetes	0.446
SHMT1	0.903	0.769	0.0387418	15.981	6.509	Diabetes	0.411
GNA11	0.854	0.846	0.012793	7.422	2.542	Diabetes	0.351
GNB4	0.816	0.615	0.0484308	13.068	6.36	Diabetes	0.491
MTHFD1	0.786	0.615	0.0309378	8.678	2.591	Diabetes	0.307
GSTA5	0.767	0.538	0.0326367	20.351	7.897	Diabetes	0.391
AKR7A3	0.757	0.462	0.0414669	13.73	3.905	Diabetes	0.29
FTCD	0.748	0.538	0.0282625	17.738	4.548	Diabetes	0.261
BGN	0.709	0.615	0.0498445	14.04	3.851	Diabetes	0.279
CCT2	0.631	0.308	0.0252598	7.588	2.261	Diabetes	0.307
DSP	0.602	0.231	0.0216491	91.575	13.553	Diabetes	0.149
ALB	1	1	0.00702585	1517.38	3516.11	pre-DKD3	2.317
TF	0.99	1	5.07433e-05	68.213	216.09	pre-DKD3	3.165
IGLL5	0.971	1	0.0103367	238.698	511.484	pre-DKD3	2.142
CP	0.951	1	0.00238897	41.854	92.732	pre-DKD3	2.213
FGA	0.932	1	0.00135731	18.926	57.945	pre-DKD3	3.051
AZGP1	0.816	0.923	0.00679103	35.767	103.551	pre-DKD3	2.89
PTGDS	0.816	0.846	0.046304	39.375	119.696	pre-DKD3	3.035
AGT	0.728	1	0.01774	19.604	44.442	pre-DKD3	2.261
FGB	0.718	1	0.00120646	16.995	74.213	pre-DKD3	4.347
FGG	0.699	1	0.000451232	14.711	147.982	pre-DKD3	9.998
SERPINC1	0.583	0.923	0.00580159	7.032	14.328	pre-DKD3	2.023
GM2A	0.544	0.846	0.0076584	19.73	49.713	pre-DKD3	2.512
HP	0.485	0.923	0.00348651	26.338	56.193	pre-DKD3	2.129
ETFA	0.379	0.615	0.0217373	2.076	6.879	pre-DKD3	3.207
CA1	0.369	0.769	0.000767838	11.106	44.809	pre-DKD3	4.008
APOA2	0.291	0.615	0.0244335	16.383	59.698	pre-DKD3	3.628
